# Supplementary material for: GABAergic neuron-specific whole-brain transduction by AAV-PHP.B incorporated with a new GAD65 promoter
Source: Springer Nature journal article supplement (doi:10.1186/s13041-021-00746-1), 2021-02-15
Supplement: MOESM1 [file 25664280]

# Supplementary Table

| Methods                                    |                       | Floating (Normal)<br>Figs. 4, 6 and Supp. Figs. 2, 3, 4                                                                                                                                                           | Floating (CaMKII or GABA & GFP)<br>Fig. 1 and Supp. Fig. 1                                                             | Cryostat (Ankyrin G)<br>Fig. 5                                                               |
|--------------------------------------------|-----------------------|-------------------------------------------------------------------------------------------------------------------------------------------------------------------------------------------------------------------|------------------------------------------------------------------------------------------------------------------------|----------------------------------------------------------------------------------------------|
| Post-fix                                   |                       | 4% PFA (1-overnight) at 4°C                                                                                                                                                                                       |                                                                                                                        | 4% PFA (4hr) at 4°C<br>25% sucrose in PBS (2-overnight)                                      |
| Brain slice                                | Thickness             | 50 µm                                                                                                                                                                                                             |                                                                                                                        | 20 µm                                                                                        |
|                                            | Equipment             | Vibratome (VT1000S, Leica)                                                                                                                                                                                        |                                                                                                                        | Cryostat (CMS3050S, Leica)                                                                   |
| Permeabilization and blockade              | Blocking solution     | PBS<br>5% normal donkey serum<br>0.5% tritonX-100<br>0.05% NaN <sub>3</sub>                                                                                                                                       |                                                                                                                        | PBS<br>2% fish collagen peptide<br>0.2% tritonX-100                                          |
|                                            | Duration              | 30 min                                                                                                                                                                                                            | 90 min                                                                                                                 | 30 min                                                                                       |
| Primary antibody reaction                  | Antibodies (Dilution) | Goat polyclonal anti-parvalbumin (1:200)<br>Rat monoclonal anti-somatostatin (1:100)<br>Goat polyclonal anti-Ankyrin G (1:50)<br>Mouse monoclonal anti-calbindin (1:500)<br>Mouse monoclonal anti-mGluR2 (1:1000) | Mouse monoclonal anti-CaMKII (1:100)<br>Rat monoclonal anti-GFP (1:1000)<br>Rabbit polyclonal anti-GABA (1:1000)       | Goat polyclonal anti-Ankyrin G (1:50)                                                        |
|                                            | Solution component    | PBS<br>5% normal donkey serum<br>0.5% tritonX-100<br>0.05% NaN <sub>3</sub>                                                                                                                                       | PBS<br>10% normal donkey serum<br>3% bovine serum albumin<br>0.05% NaN <sub>3</sub>                                    | PBS<br>2% fish collagen peptide<br>0.2% tritonX-100                                          |
|                                            | Reaction time         | 1-overnight at 4°C                                                                                                                                                                                                | 2-overnight at room temperature                                                                                        | 1-overnight at 4°C                                                                           |
| Washing before secondary antibody reaction |                       | PBS with 0.5% TritonX-100 (2 times)<br>PBS with 0.1% TritonX-100 (3 times)                                                                                                                                        | PBS (4 times)                                                                                                          | PBS (rinse 1 time)                                                                           |
| Secondary antibody reaction                | Dilution              | 1:1000                                                                                                                                                                                                            |                                                                                                                        | 1:200                                                                                        |
|                                            | Antibodies            | Alexa Fluor 488-donkey anti-rat IgG<br>Alexa Fluor 568-donkey anti-mouse IgG<br>Alexa Fluor 594-donkey anti-rat IgG<br>Alexa Fluor 647-donkey anti-goat IgG<br>Alexa Fluor 647-donkey anti-mouse IgG              | Alexa Fluor 488-donkey anti-rat IgG<br>Alexa Fluor 647-donkey anti-mouse IgG<br>Alexa Fluor 647-donkey anti-rabbit IgG | Donkey anti-Goat IgG (H+L) Highly Cross-Adsorbed Secondary Antibody,<br>Alexa Fluor Plus 647 |
|                                            | Solution component    | Same as the primary antibody solution                                                                                                                                                                             |                                                                                                                        |                                                                                              |
|                                            | Reaction time         | 1-overnight at 4°C                                                                                                                                                                                                | 6 hr at room temperature                                                                                               | 1 hr at room temperature                                                                     |
| Washing before mounting                    |                       | PBS with 0.5% TritonX-100 (2 times)<br>PBS with 0.1% TritonX-100 (3 times)<br>PBS (2 times)                                                                                                                       | PBS (5 times)                                                                                                          |                                                                                              |
| Mounting medium                            |                       | Prolong Gold/Diamond Antifade Reagent                                                                                                                                                                             |                                                                                                                        | CC/Mountant antifade reagent                                                                 |

PFA: Paraformaldehyde phosphate buffer; PBS: Phosphate-buffered saline
